# Supplementary material
Source: PubMed Central journal article supplement (PMC1855010)

# Supplemental Fig S1

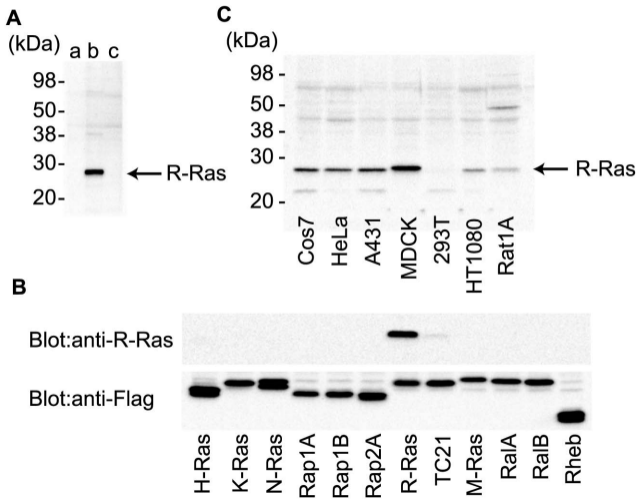

Supplemental Fig S2

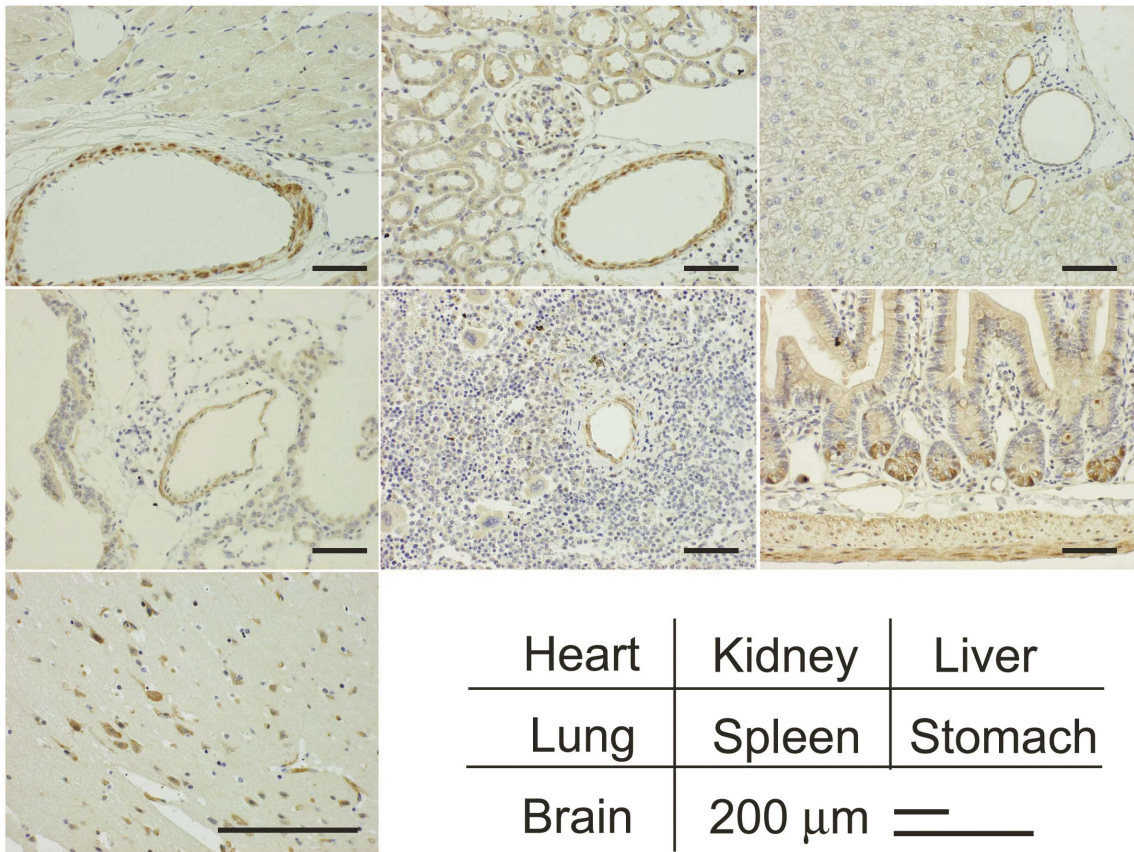

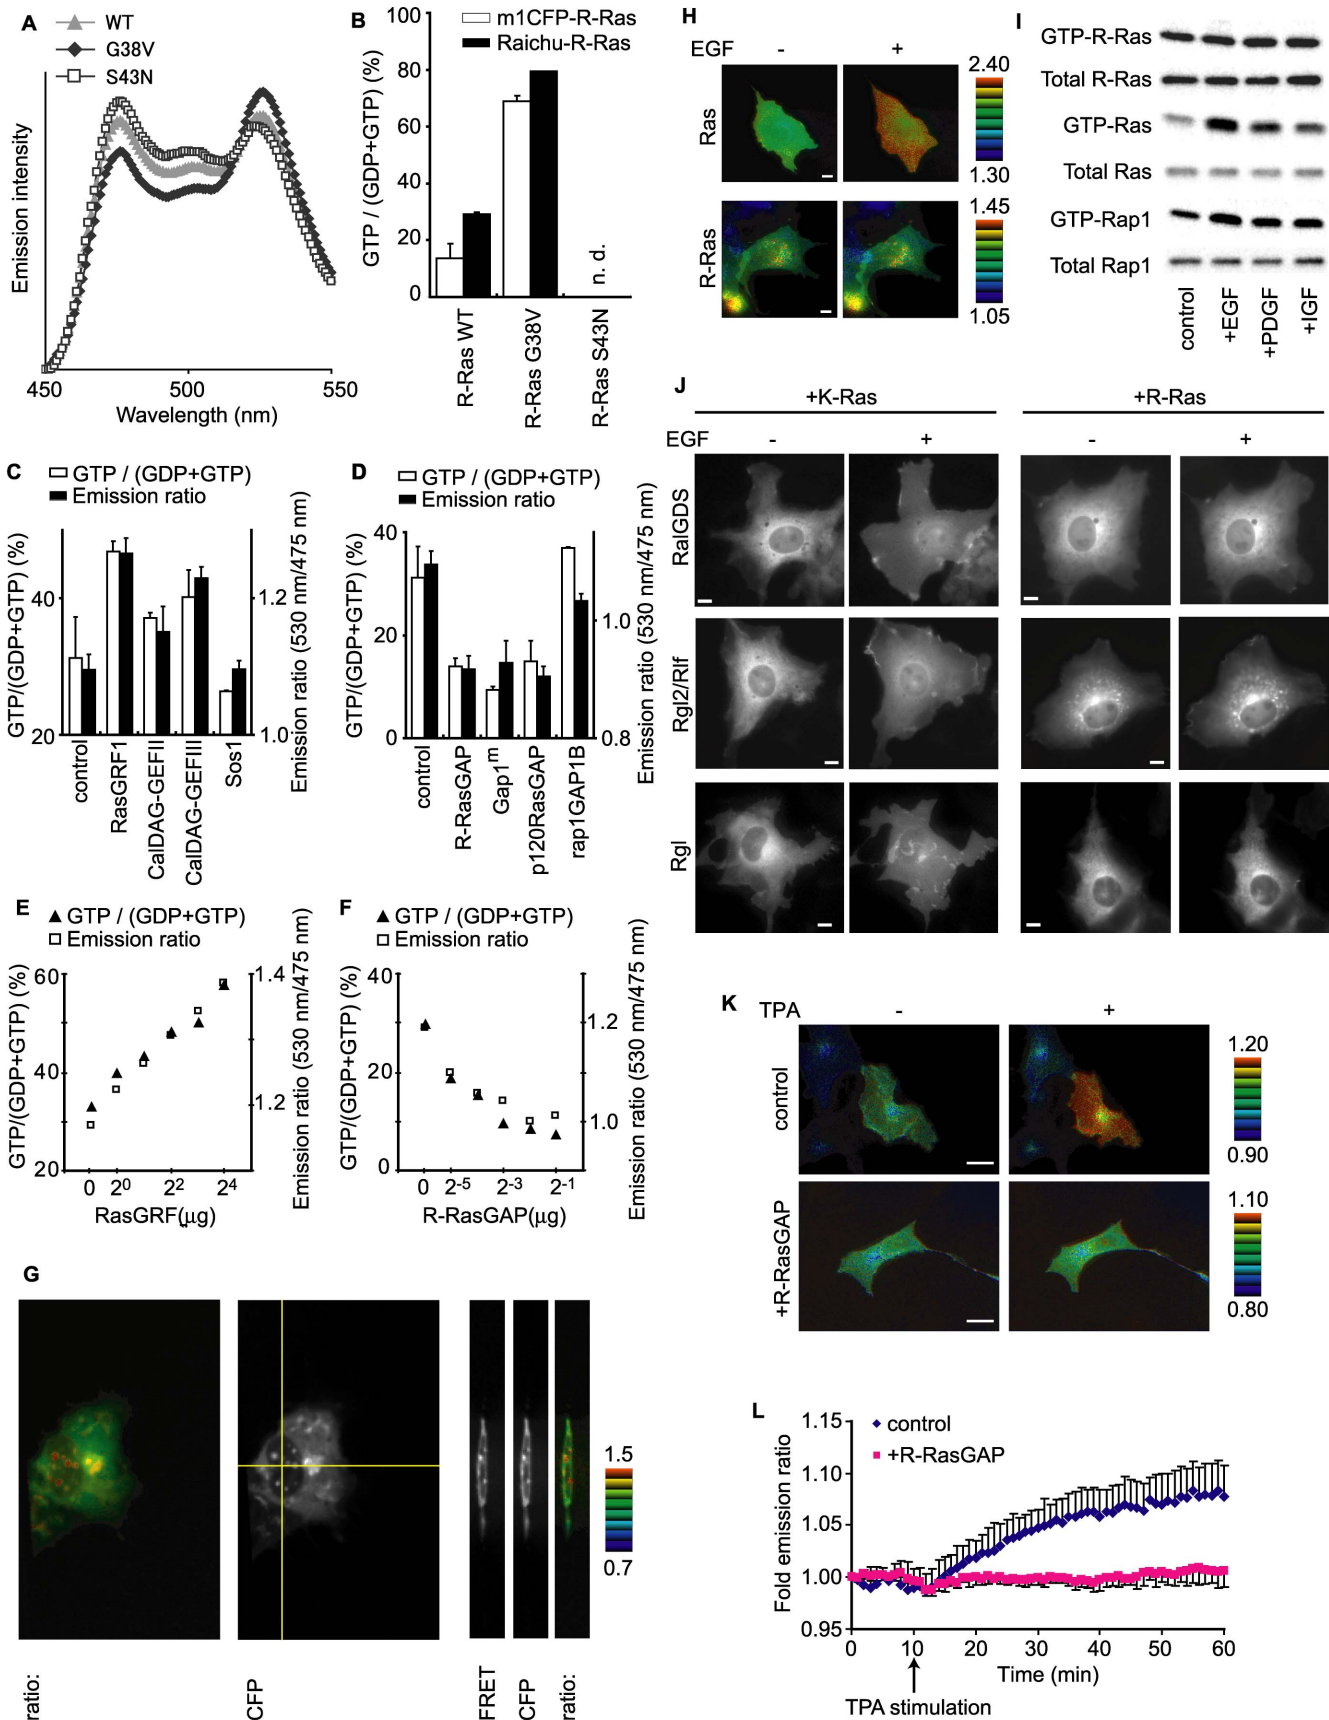



**A**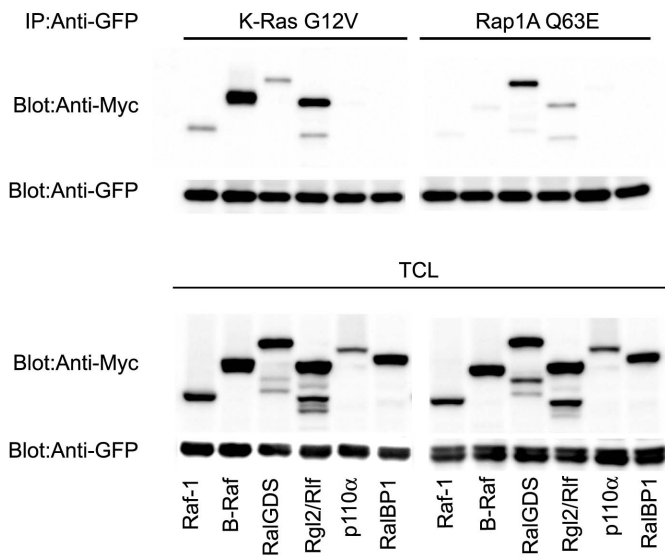**B**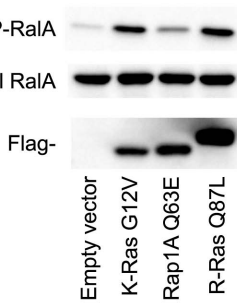**C**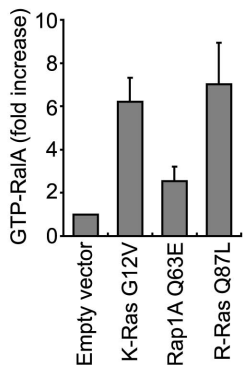**D**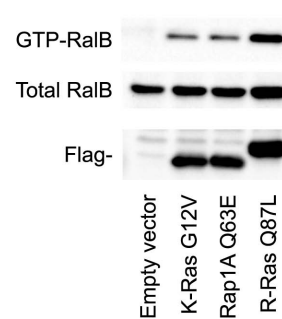**E**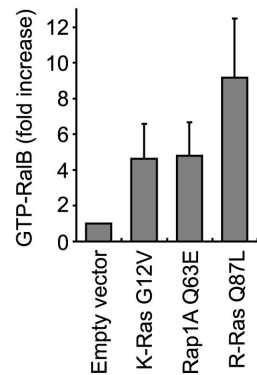**F**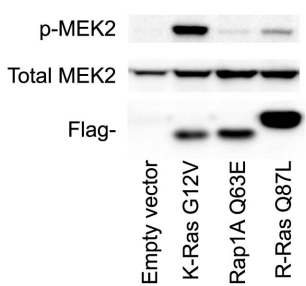**G**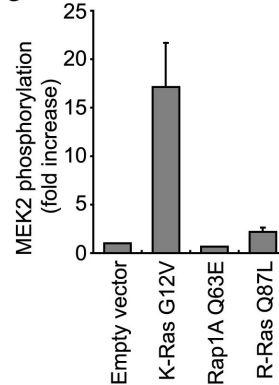**H**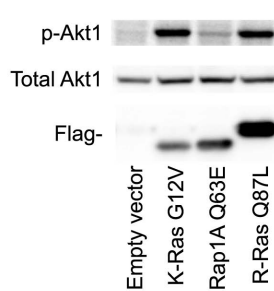**I**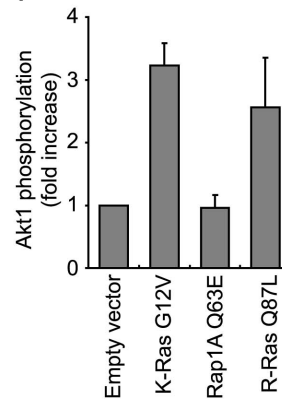

**A**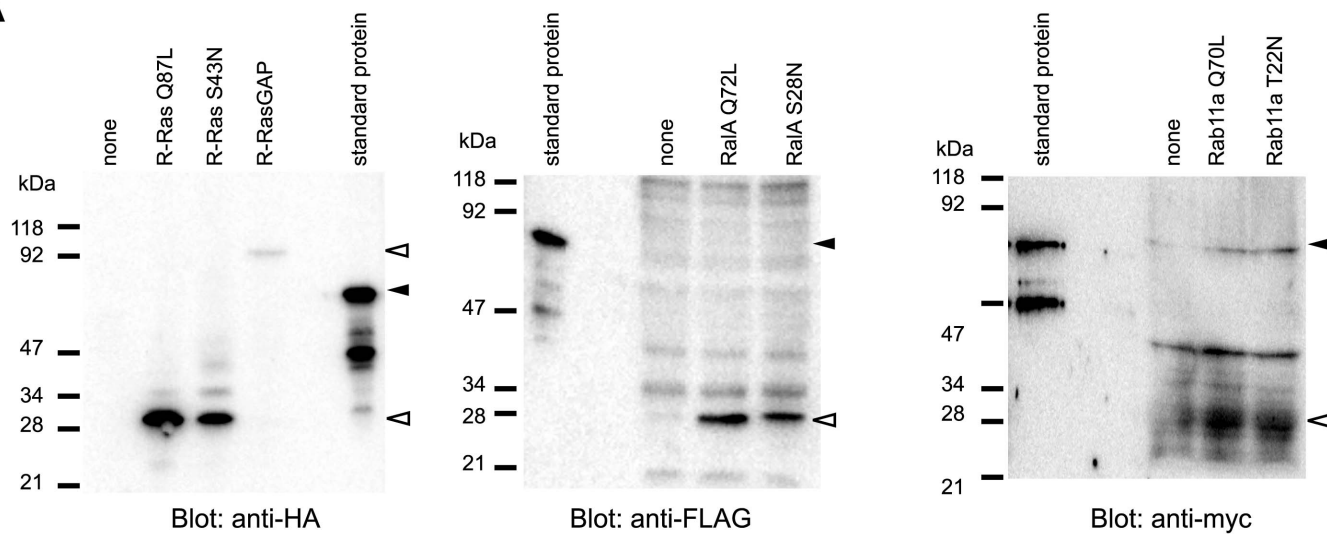**B**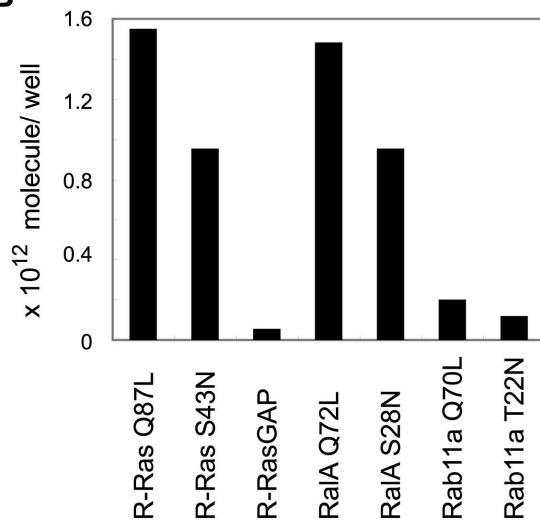

Supplement: mbc_E06-08-0765_1.pdf [file mbc_E06-08-0765_1.pdf]
